# Supplementary material for: A metal–organic framework as a “turn on” fluorescent sensor for aluminum ions
Source: Royal Society of Chemistry journal article supplement (doi:10.1039/c6qi00362a), 2016-11-29
Supplement: c6qi00362a1.pdf [file c6qi00362a1.pdf]

## Electronic Supporting Information (ESI)

### A Metal-Organic Framework as a “Turn on” Fluorescent Sensor for Aluminum Ions

Mei-Hui Yu,<sup>†</sup> Tong-Liang Hu<sup>\*,†,§</sup>, and Xian-He Bu<sup>\*,†,‡,§</sup>

<sup>†</sup>School of Materials Science and Engineering, National Institute for Advanced Materials, Tianjin Key Laboratory of Metal and Molecule-Based Material Chemistry, Nankai University, Tianjin 300350, China.

<sup>‡</sup>State Key Laboratory of Elemento-Organic Chemistry, Nankai University, Tianjin 300071, China.

<sup>§</sup>Collaborative Innovation Center of Chemical Science and Engineering (Tianjin), Tianjin 300071, China.

---

\*Corresponding author. E-mail: [tlhu@nankai.edu.cn](mailto:tlhu@nankai.edu.cn) (T.-L. Hu); [buxh@nankai.edu.cn](mailto:buxh@nankai.edu.cn) (X.-H. Bu).

## Section 1. Experimental Section

### 1. Synthesis of HO-H<sub>3</sub>BTC ligand

Synthesis procedure for HO-H<sub>3</sub>BTC was shown in Fig. S1. CH<sub>3</sub>CN (260 mL) was added to the mixture of 2,6-bis(hydroxymethyl)-4-cresol (10 g) and K<sub>2</sub>CO<sub>3</sub> (16.37 g), then CH<sub>3</sub>I (10.16 g) was slowly added with constant stirring. The reaction mixture was heated to reflux at 80 °C for 36 h. After reaction, the mixture was filtered and the solvent of filtrate was removed in vacuo. Finally, the pure product (**1**) was obtained (7.0 g). <sup>1</sup>H NMR (300 MHz, DMSO): 7.08 (2H), 5.02 (2H), 4.47 (4H), 3.62 (3H), 2.25 (3H) (Fig. S2).

A mixture of (**1**) (5.0 g) obtained from above step, NaOH (0.55 g) and 165 mL H<sub>2</sub>O were added in a 500 mL flask equipped with magnetic stirrer and oil bath. 20.3 g KMnO<sub>4</sub> was added in several batches to the solution while stirring and without heating. The resultant brown slurry was heated to 80 °C for 72 h. The resultant was filtered to remove the large amount of MnO<sub>2</sub>, and the filtrate was acidified with hydrochloric acid. Under vacuum state, the solvent H<sub>2</sub>O was removed, and then CH<sub>3</sub>OH was added in the obtaining product. Finally, removal of CH<sub>3</sub>OH in vacuo yields the product (**2**) methoxy-BTC (3.3 g). <sup>1</sup>H NMR (300 MHz, D<sub>2</sub>O): 8.12 (2H), 3.71 (3H) (Fig. S2).

A mixture of methoxy-BTC (3 g) and 48% HBr (63 mL) was placed in a 250 mL bottom flask. The reaction mixture was heated to reflux at 150 °C for 48 h. When the reaction was complete, the hydrobromic acid was removed under reduced pressure, and the residue was mixed with small amount of water. The

2-hydroxy-benzene-1,3,5-tricarboxylic acid (HO-H<sub>3</sub>BTC 2.4 g) was collected followed by filtration. <sup>1</sup>H NMR (300 MHz, DMSO): 8.45 (2H) (Fig. S2). ESI-MS (m/z):225.0 (M - 1) (Fig. S3).

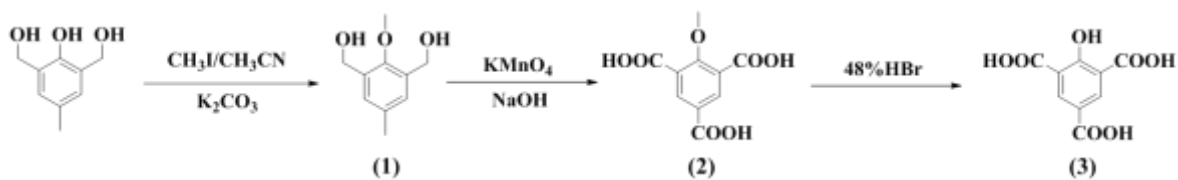

**Fig. S1** Synthesis procedure for HO-H<sub>3</sub>BTC.

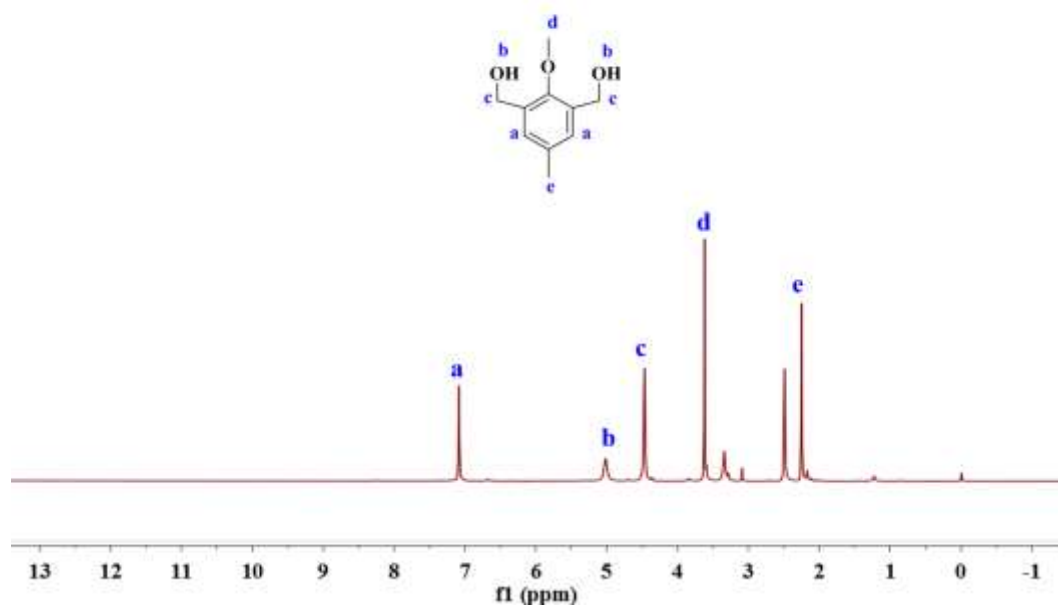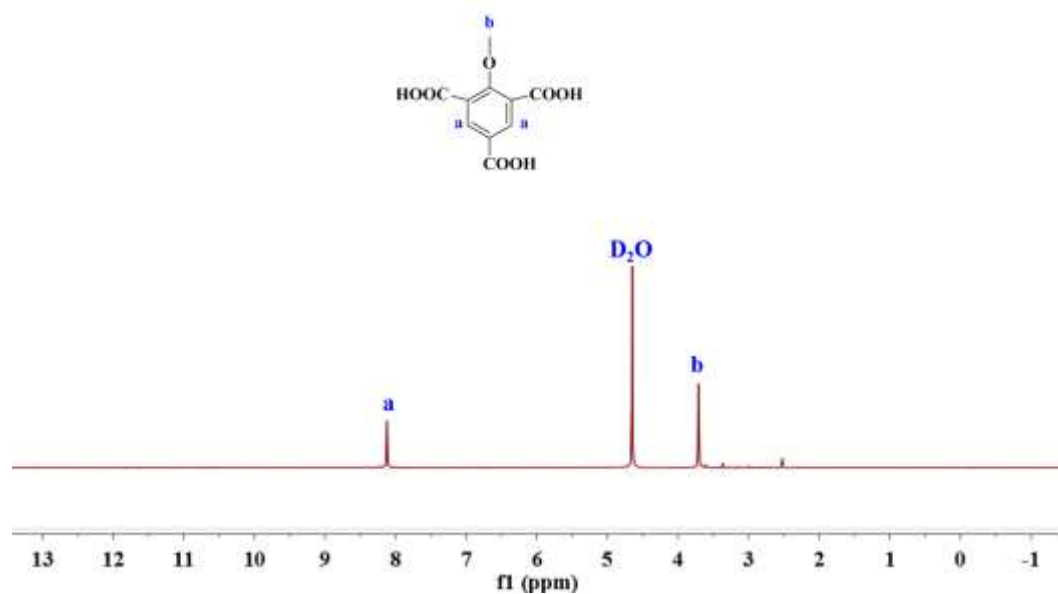

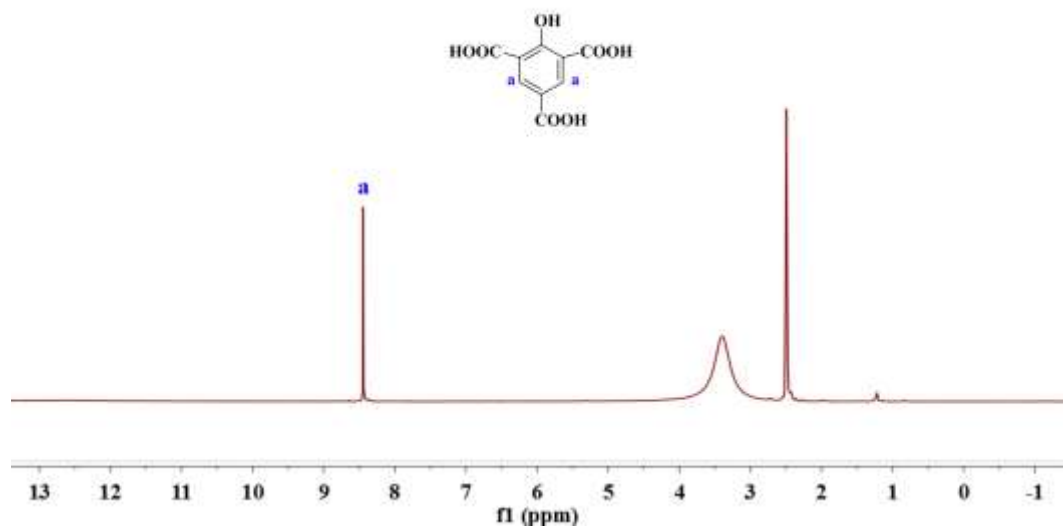

**Fig. S2** <sup>1</sup>H NMR spectroscopy of every step in the process of synthesizing HO-H<sub>3</sub>BTC ligand.

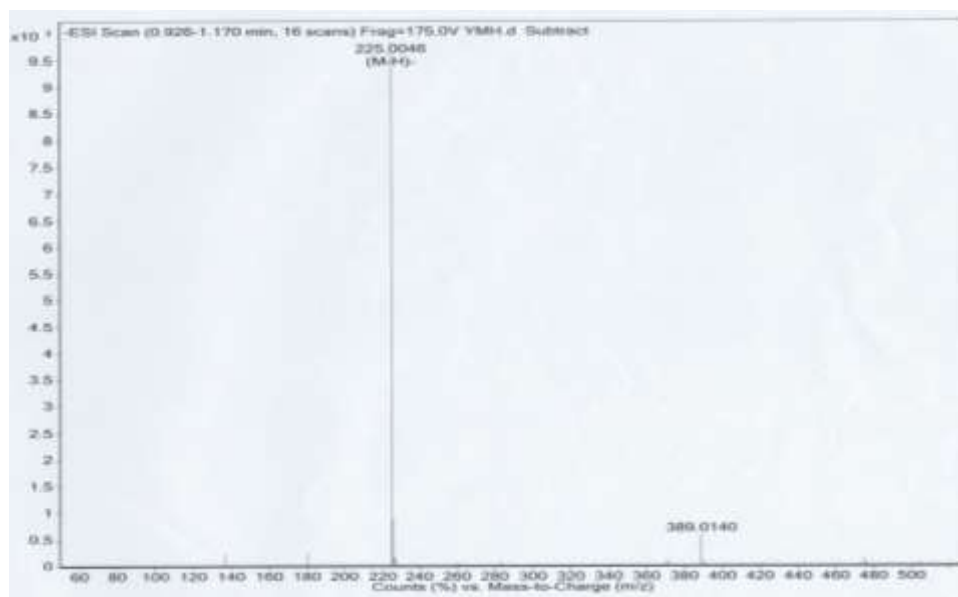

**Fig. S3** The mass spectra (MS) of HO-H<sub>3</sub>BTC ligand.

## Section 2. Supplementary Tables and Figures

**Table S1.** Crystal data and structure refinement parameters for **NUM-2**

|                                                                                                 |  | NUM-2                                                             |        |
|-------------------------------------------------------------------------------------------------|--|-------------------------------------------------------------------|--------|
| Formula                                                                                         |  | C <sub>14</sub> H <sub>12</sub> NO <sub>10</sub> Zn <sub>2</sub>  |        |
| <i>Mr</i> (g mol <sup>-1</sup> )                                                                |  | 485.03                                                            |        |
| Space group                                                                                     |  | <i>P</i> 2 <sub>1</sub> / <i>c</i>                                |        |
| Crystal system                                                                                  |  | Monoclinic                                                        |        |
| <i>a</i> (Å)                                                                                    |  | 10.997(2)                                                         |        |
| <i>b</i> (Å)                                                                                    |  | 14.914(3)                                                         |        |
| <i>c</i> (Å)                                                                                    |  | 14.368(3)                                                         |        |
| $\beta$ (°)                                                                                     |  | 109.31(3)                                                         |        |
| <i>V</i> (Å <sup>3</sup> )                                                                      |  | 2224.0(8)                                                         |        |
| <i>Z</i>                                                                                        |  | 4                                                                 |        |
| <i>F</i> (000)                                                                                  |  | 972.0                                                             |        |
| <i>D<sub>c</sub></i> (gcm <sup>-3</sup> )                                                       |  | 1.449                                                             |        |
| $\mu$ (mm <sup>-1</sup> )                                                                       |  | 2.200                                                             |        |
| <i>R</i> <sub>int</sub>                                                                         |  | 0.0399                                                            |        |
| Limiting indices                                                                                |  | -13 ≤ <i>h</i> ≤ 13<br>-17 ≤ <i>k</i> ≤ 17<br>-17 ≤ <i>l</i> ≤ 17 |        |
| GOF on <i>F</i> <sup>2</sup>                                                                    |  | 1.058                                                             |        |
| <i>R</i> <sub><i>I</i></sub> , <i>wR</i> <sub>2</sub> [ <i>I</i> > 2σ( <i>I</i> )] <sup>a</sup> |  | 0.0537                                                            | 0.0632 |
| <i>R</i> <sub><i>I</i></sub> , <i>wR</i> <sub>2</sub> [all data] <sup>b</sup>                   |  | 0.1279                                                            | 0.1333 |

$$^a R_1 = \sum ||F_o| - |F_c|| / \sum |F_o|. \quad ^b wR_2 = \{ \sum [w(F_o^2 - F_c^2)^2] / \sum w(F_o^2)^2 \}^{1/2}$$

**Table S2** Selected bond lengths (Å) for **NUM-2**

|                                              |                                           |                                     |          |
|----------------------------------------------|-------------------------------------------|-------------------------------------|----------|
| Zn(1)-O(10)#1                                | 1.965(4)                                  | Zn(2)-O(2)                          | 2.040(4) |
| Zn(1)-O(5)#2                                 | 1.968(4)                                  | Zn(2)-O(7)                          | 2.071(5) |
| Zn(1)-O(3)                                   | 1.989(4)                                  | Zn(2)-O(6)                          | 2.130(4) |
| Zn(1)-O(1)#2                                 | 2.043(3)                                  | Zn(2)-O(9)                          | 2.155(4) |
| Zn(1)-O(1)                                   | 2.048(3)                                  | Zn(2)-N(1)                          | 2.161(5) |
| Zn(2)-O(8)#3                                 | 2.034(4)                                  |                                     |          |
| #1 <i>x</i> , - <i>y</i> +1/2, <i>z</i> -1/2 | #2 - <i>x</i> +1, - <i>y</i> , - <i>z</i> | #3 <i>x</i> -1, <i>y</i> , <i>z</i> |          |

**Table S3** Selected angles (°) for NUM-2

|                       |                   |                   |            |
|-----------------------|-------------------|-------------------|------------|
| O(10)#1-Zn(1)-O(5)#2  | 115.15(19)        | O(8)#3-Zn(2)-O(6) | 92.34(17)  |
| O(10)#1-Zn(1)-O(3)    | 109.17(18)        | O(2)-Zn(2)-O(6)   | 91.39(17)  |
| O(5)#2-Zn(1)-O(3)     | 90.71(16)         | O(7)-Zn(2)-O(6)   | 86.73(18)  |
| O(10)#1-Zn(1)-O(1)#2  | 105.06(16)        | O(8)#3-Zn(2)-O(9) | 82.71(16)  |
| O(5)#2-Zn(1)-O(1)#2   | 85.12(14)         | O(2)-Zn(2)-O(9)   | 82.86(17)  |
| O(3)-Zn(1)-O(1)#2     | 143.82(17)        | O(7)-Zn(2)-O(9)   | 174.67(19) |
| O(10)#1-Zn(1)-O(1)    | 105.17(15)        | O(6)-Zn(2)-O(9)   | 87.94(19)  |
| O(5)#2-Zn(1)-O(1)     | 138.65(18)        | O(8)#3-Zn(2)-N(1) | 91.80(18)  |
| O(3)-Zn(1)-O(1)       | 84.31(14)         | O(2)-Zn(2)-N(1)   | 85.16(18)  |
| O(1)#2-Zn(1)-O(1)     | 75.70(14)         | O(7)-Zn(2)-N(1)   | 90.5(2)    |
| O(8)#3-Zn(2)-O(2)     | 164.95(15)        | O(6)-Zn(2)-N(1)   | 175.31(18) |
| O(8)#3-Zn(2)-O(7)     | 97.68(17)         | O(9)-Zn(2)-N(1)   | 94.8(2)    |
| O(2)-Zn(2)-O(7)       | 97.08(18)         |                   |            |
| #1 $x, -y+1/2, z-1/2$ | #2 $-x+1, -y, -z$ | #3 $x-1, y, z$    |            |

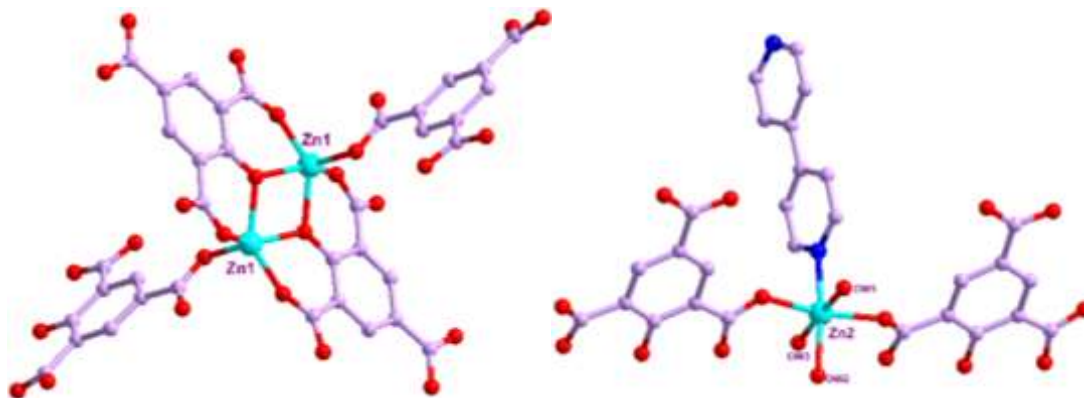**Fig. S4** The coordination environment of Zn1 and Zn2.

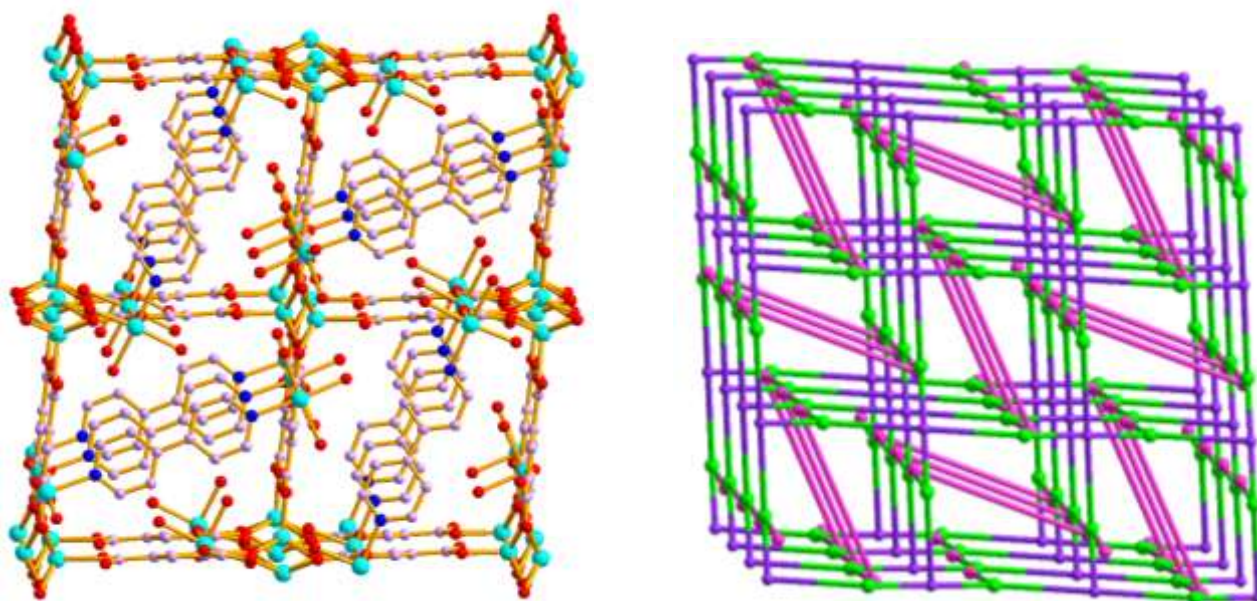

**Fig. S5** (a) The 3D structure of **NUM-2**; (b) The framework topology of (3,4)-connected network with Point (Schlafli) symbol  $\{6 \cdot 7^5\}_2\{6^2 \cdot 8\}_2\{7^4 \cdot 8^2\}$ .

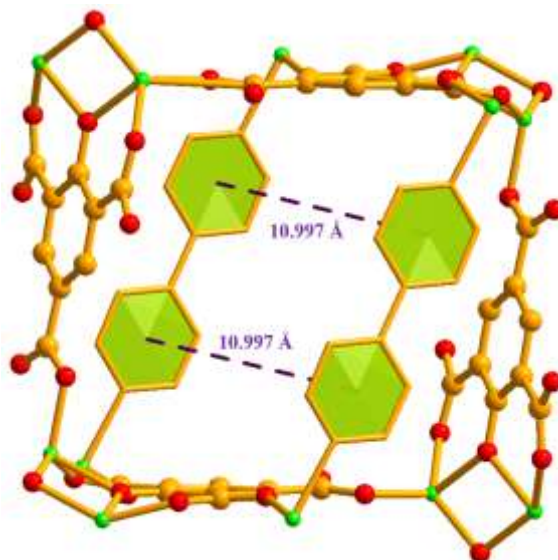

**Fig. S6** The distance of pyridine rings between the two 4,4'-BPY ligands.

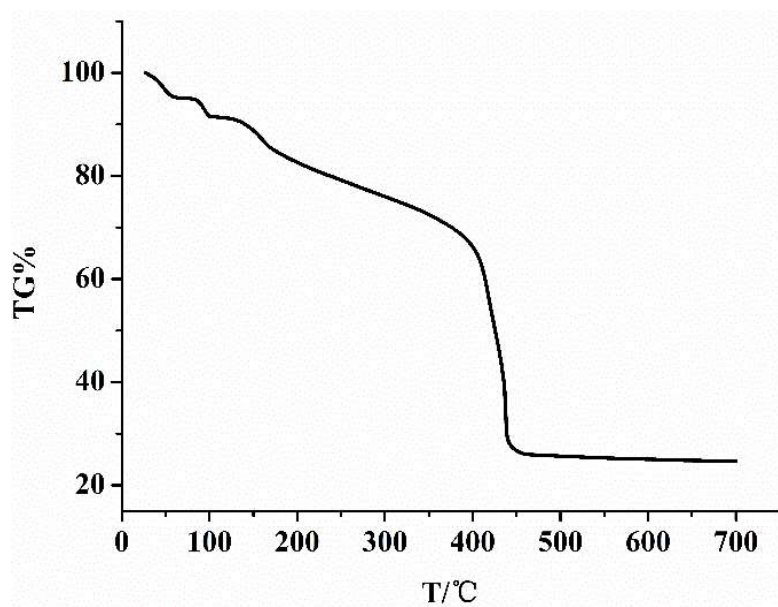

**Fig. S7** TGA curve of NUM-2.

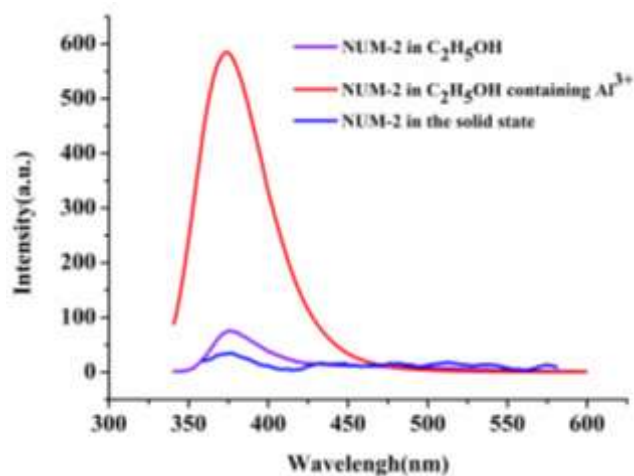

**Fig. S8** The luminescent spectra of NUM-2 in solid state, in C<sub>2</sub>H<sub>5</sub>OH solution, and in C<sub>2</sub>H<sub>5</sub>OH solution containing Al<sup>3+</sup> ( $1 \times 10^{-3}$  mol L<sup>-1</sup>) at room temperature,  $\lambda_{\text{ex}} = 324$  nm.

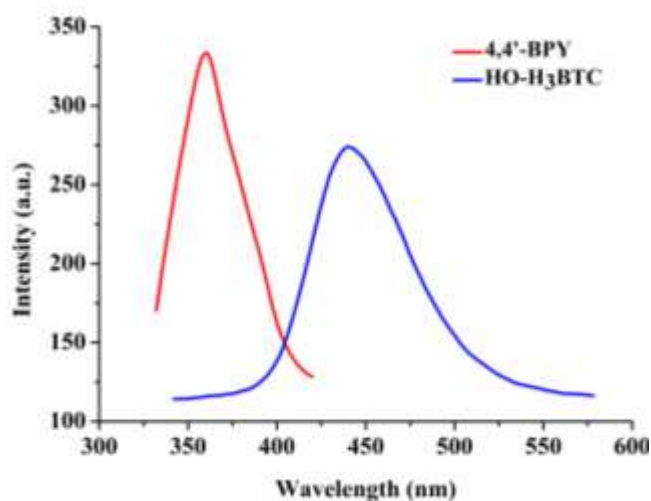

**Fig. S9** The luminescent spectra of 4,4'-BPY and HO-H<sub>3</sub>BTC in solid state.

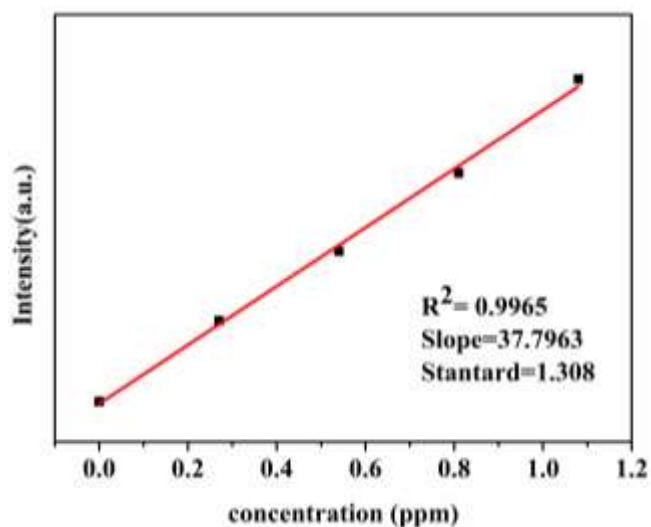

**Fig. S10** Fitting plots of the detection limit Al<sup>3+</sup> in C<sub>2</sub>H<sub>5</sub>OH solution for NUM-2.



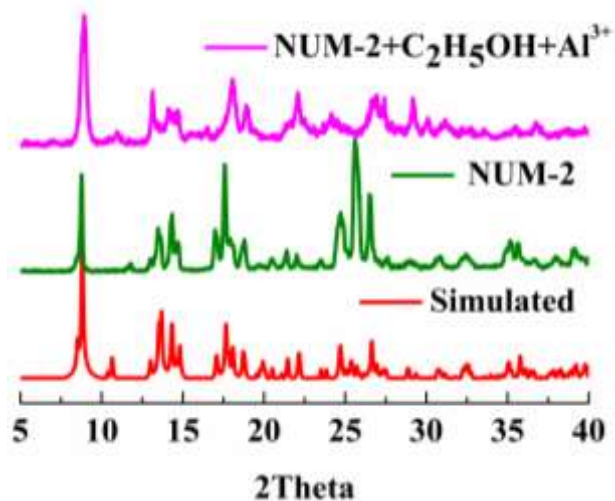

**Fig. S11** Comparison of PXRD patterns of the sample at different condition and simulated pattern from single crystal data.

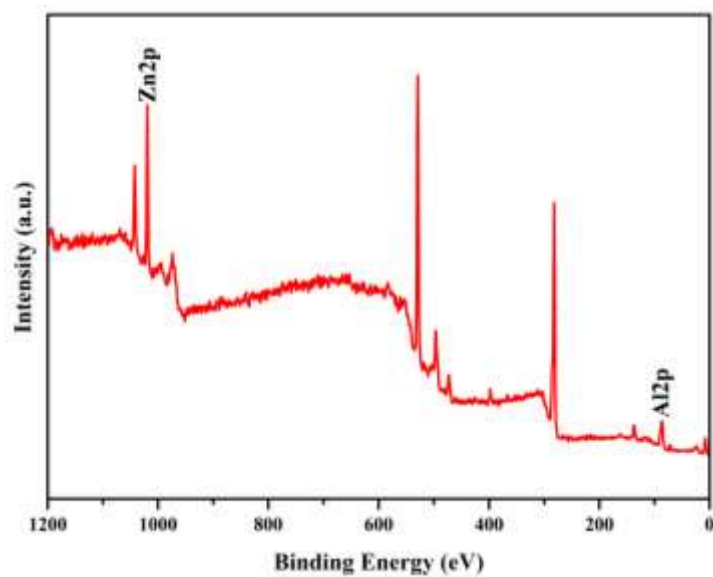

**Fig. S12** The XPS pattern of the sample after fluorescent measurement.

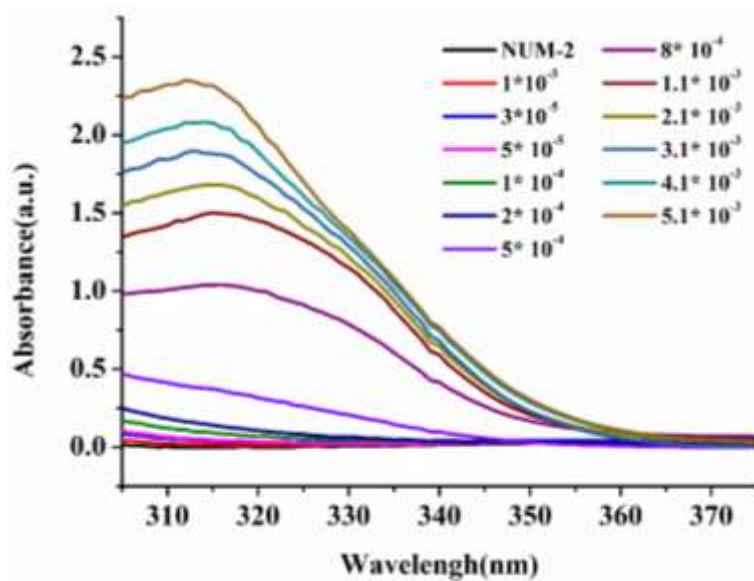

**Fig. S13** UV-vis spectra NUM-2 dispersed in C<sub>2</sub>H<sub>5</sub>OH treated with gradually increasing Al<sup>3+</sup> ion concentration (mol L<sup>-1</sup>).
